# Supplementary material for: Differences in globus pallidus neuronal firing rates and patterns relate to different disease biology in children with dystonia
Source: PubMed Central journal article supplement (PMC5013118; doi:10.1136/jnnp-2015-311803), 2016-02-04
Supplement: jnnp-2015-311803-s2.pdf [file jnnp-2015-311803-s2.pdf]

| Patient | Age at DBS | Male (M) or Female (F) | Dystonia Group   | Age at onset (years) | Distribution of dystonia                                          | Phenotype: Fixed or Phasic | Inherited, Acquired, Idiopathic     | Aetiology-                                                                                       | Imaging                                                              | Medication at time of surgery                          | Duration of Dystonia (years) | Proportion of Life Lived with dystonia | Baseline BFMDRS motor score | 1 year BFMDRS motor score | % Improvement at 1 year |
|---------|------------|------------------------|------------------|----------------------|-------------------------------------------------------------------|----------------------------|-------------------------------------|--------------------------------------------------------------------------------------------------|----------------------------------------------------------------------|--------------------------------------------------------|------------------------------|----------------------------------------|-----------------------------|---------------------------|-------------------------|
| 1       | 13.9       | M                      | Primary          | 10.9                 | Generalised. Neck, trunk and all 4 limbs                          | Phasic                     | Inherited                           | DYT1 positive                                                                                    | Normal                                                               | None (previous either ineffective or side effects)     | 3                            | 0.22                                   | 57                          | 23                        | 59.6                    |
| 2       | 11.8       | M                      | Primary          | 8                    | Generalised, particularly both legs and left arm                  | Fixed                      | Inherited                           | DYT1 positive                                                                                    | Normal                                                               | Co-Careldopa                                           | 3.8                          | 0.32                                   | 59.5                        | 10                        | 83.2                    |
| 3       | 7.3        | F                      | Primary          | 6.3                  | Generalised, particularly both legs and right arm                 | Fixed                      | Inherited                           | DYT1 positive                                                                                    | Normal                                                               | Trihexyphenidyl                                        | 1                            | 0.14                                   | 50                          | 6                         | 88.0                    |
| 4       | 10.8       | M                      | Primary          | 3.5                  | Generalised                                                       | Fixed                      | Idiopathic                          | Idiopathic (DYT1, DYT5 and PANK2 negative)                                                       | Normal                                                               | None                                                   | 7.3                          | 0.68                                   | 75                          | 26.5                      | 64.7                    |
| 5       | 13.9       | M                      | Primary          | 11.5                 | Generalised                                                       | Fixed                      | Inherited (positive family history) | Idiopathic                                                                                       | Normal                                                               | Diazepam                                               | 2.4                          | 0.17                                   | 48                          | 15.5                      | 67.7                    |
| 6       | 12.9       | M                      | Primary (plus)   | 2.9                  | Generalised – particularly face and upper limbs                   | Phasic                     | Inherited                           | DYT11                                                                                            | Normal                                                               | None                                                   | 10                           | 0.78                                   | 30                          | 9.5                       | 68.3                    |
| 7       | 17.1       | F                      | Primary (plus)   | 14.1                 | Predominantly right upper limb                                    | Phasic                     | Inherited                           | Idiopathic (DYT11 and TITF1 negative)                                                            | Normal                                                               | None                                                   | 3                            | 0.18                                   | 8                           | 1                         | 87.5                    |
| 8       | 12.2       | F                      | Primary (plus)   | 0.2                  | Generalised                                                       | Phasic                     | Idiopathic                          | Idiopathic                                                                                       | Normal                                                               | None                                                   | 12                           | 0.98                                   | 34                          | 35                        | -2.9                    |
| 9       | 8.9        | M                      | Primary (plus)   | 0.5                  | Generalised                                                       | Fixed                      | Idiopathic                          | Unknown                                                                                          | Normal                                                               | Baclofen<br>Trihexyphenidyl                            | 8.4                          | 0.94                                   | 64.5                        | 55.5                      | 14.0                    |
| 10      | 15.9       | F                      | Primary (plus)   | 0.6                  | Generalised                                                       | Phasic                     | Idiopathic                          | Unknown                                                                                          | Normal                                                               | None                                                   | 15.3                         | 0.96                                   | 59                          | N/A *                     | N/A *                   |
| 11      | 13.1       | F                      | Primary (plus)   | 9.1                  | Generalised                                                       | Phasic                     | Idiopathic                          | Unknown                                                                                          | Normal                                                               | Intrathecal baclofen<br>Trihexiphenidyl<br>Diazepam    | 4                            | 0.31                                   | 89.5                        | 78                        | 12.8                    |
| 12      | 17.4       | F                      | Primary (plus)   | 4.4                  | Generalised but predominantly upper limbs (R>L) and R lower limb. | Phasic                     | Idiopathic                          | Unknown                                                                                          | Normal basal ganglia.<br>Non-specific left Hippocampus abnormality   | None                                                   | 13                           | 0.75                                   | 38                          | 16.5                      | 56.6                    |
| 13      | 4.5        | M                      | Primary (plus)   | 0.8                  | Generalised                                                       | Phasic                     | Idiopathic                          | Unknown                                                                                          | Normal basal ganglia.<br>Non-specific left frontal arachnoid cyst    | Lorazepam<br>Tizanidine<br>Trihexyphenidyl             | 3.7                          | 0.82                                   | 88.5                        | 96.5                      | -9.0                    |
| 14      | 18.1       | M                      | Primary (plus)   | 9                    | Generalised                                                       | Fixed                      | Idiopathic                          | Unknown                                                                                          | Normal                                                               | Sinemet plus                                           | 9.1                          | 0.50                                   | 24                          | 31                        | -29.2                   |
| 15      | 12.6       | F                      | Secondary static | 0.6                  | Generalised                                                       | Fixed                      | Acquired                            | Ex-premature 26/40 (Perinatal brain injury)                                                      | Thalamus, PVWM                                                       | Baclofen<br>Nitrazepam                                 | 12                           | 0.95                                   | 103                         | 86                        | 16.5                    |
| 16      | 7.9        | M                      | Secondary static | 0.9                  | Generalised                                                       | Fixed                      | Acquired                            | Ex premature 27/40 (Perinatal brain injury)                                                      | PVWM                                                                 | Baclofen<br>Clonidine<br>Trihexiphenidyl Dantrolene    | 7                            | 0.89                                   | 106                         | 109.5                     | -3.3                    |
| 17      | 6.1        | F                      | Secondary static | 0.1                  | Generalised                                                       | Phasic                     | Acquired                            | Ex-premature 24/40 (Perinatal brain injury)                                                      | PVWM                                                                 | Trihexiphenidyl                                        | 6                            | 0.98                                   | 106.5                       | 97                        | 8.9                     |
| 18      | 10.6       | M                      | Secondary static | 0                    | Generalised                                                       | Fixed                      | Acquired                            | Ex-premature 25 /40 (Perinatal brain injury)                                                     | Normal                                                               | Trihexiphenidyl                                        | 10.6                         | 1.00                                   | 87.5                        | 84                        | 4.0                     |
| 19      | 9.2        | M                      | Secondary static | 0.2                  | Generalised                                                       | Phasic                     | Acquired                            | Ex-premature 32/40 twin, twin-twin transfusion donor, neonatal sepsis (Perinatal brain injury)   | Signal change and volume loss in Globi pallidi and PVWM              | Clonazepam                                             | 9                            | 0.98                                   | 109.5                       | 101.5                     | 7.3                     |
| 20      | 5.5        | F                      | Secondary static | 0                    | Generalised                                                       | Phasic                     | Acquired                            | Ex premature 25/40 twin (Perinatal brain injury)                                                 | White matter volume loss + Focal right cerebellar cortical dysplasia | None                                                   | 5.5                          | 1.00                                   | 110                         | 111                       | -0.9                    |
| 21      | 12.1       | M                      | Secondary static | 0.1                  | Generalised                                                       | Fixed                      | Acquired                            | (Perinatal brain injury)<br>Ex-premature 28/40<br>G6PD deficiency leading to hyperbilirubinaemia | Basal ganglia normal<br>Minimal white matter volume loss,            | Baclofen<br>Trihexiphenidyl Nitrazepam,<br>Haloperidol | 12                           | 0.99                                   | 114.5                       | 106                       | 7.4                     |
| 22      | 16.8       | F                      | Secondary static | 0.8                  | Generalised                                                       | Phasic                     | Acquired                            | Term HIE (Perinatal brain injury)                                                                | Gliosis of thalami, lentiform nuclei and periorolandi cortex.        | Trihexiphenidyl                                        | 16                           | 0.95                                   | 107                         | 110                       | -2.8                    |

|    |      |   |                       |     |                                           |        |                                        |                                                                              |                                                                             |                                                                        |      |      |       |        |       |
|----|------|---|-----------------------|-----|-------------------------------------------|--------|----------------------------------------|------------------------------------------------------------------------------|-----------------------------------------------------------------------------|------------------------------------------------------------------------|------|------|-------|--------|-------|
| 23 | 13.7 | M | Secondary static      | 1.7 | Generalised                               | Fixed  | Acquired                               | Term HIE (Perinatal brain injury)                                            | Gliosis of thalami, lentiform nuclei and periorolandi cortex                | Trihexiphenidyl<br>Baclofen                                            | 12   | 0.88 | 102.5 | 93     | 9.3   |
| 24 | 17.8 | F | Secondary static      | 0.8 | Generalised                               | Phasic | Acquired                               | Term HIE (Perinatal brain injury)                                            | Gliosis of thalami, lentiform nuclei and periorolandi cortex                | Baclofen                                                               | 17   | 0.96 | 72    | 73     | -1.4  |
| 25 | 7.2  | M | Secondary static      | 0   | Generalised                               | Phasic | Acquired                               | Term kernictuerus (Perinatal brain injury)                                   | Gliotic change in Globi pallidi consistent with previous elevated bilirubin | None                                                                   | 7.2  | 1.00 | 66    | 77.5   | -17.4 |
| 26 | 3.5  | M | Secondary static      | 0   | Generalised                               | Fixed  | Acquired                               | Term kernictuerus (Crigler-Najjar) (Perinatal brain injury)                  | Gliotic change in Globi pallidi consistent with previous elevated bilirubin | Trihemiphenidyl<br>Nitrazepam                                          | 3.5  | 1.00 | 98    | 106.5  | -8.7  |
| 27 | 12.3 | M | Secondary static      | 0   | Generalised                               | Fixed  | Acquired                               | Term kernictuerus (Perinatal brain injury)                                   | Signal change in Globus pallidi                                             | Baclofen,<br>Trihexiphenidyl<br>Co-careldopa                           | 12.3 | 0.98 | 111.5 | 107    | 4.0   |
| 28 | 10.6 | F | Secondary static      | 0.6 | Generalised                               | Fixed  | Inherited – inborn error of metabolism | Glutaric aciduria type 1 (Toxic/metabolic)                                   | Gliotic change and volume loss in basal ganglia and white matter            | Baclofen<br>Chloral hydrate<br>Diazepam<br>Clonazepam<br>Tetrabenazine | 10   | 0.94 | 112.5 | 95.5   | 15.1  |
| 29 | 15.7 | M | Secondary static      | 1.7 | Generalised                               | Fixed  | Inherited – inborn error of metabolism | Glutaric aciduria type 1 (Toxic/metabolic)                                   | Gliotic change and volume loss in basal ganglia and white matter            | Diazepam<br>Baclofen<br>Trihexyphenidyl                                | 14   | 0.89 | 114.5 | 105.5  | 7.9   |
| 30 | 10.4 | F | Secondary static      | 3   | Left hemidystonia                         | Phasic | Acquired                               | Focal infarct (Vascular)                                                     | Infarct right caudate and pallidum                                          | None                                                                   | 7.4  | 0.71 | 30.5  | 16.5   | 45.9  |
| 31 | 3.3  | M | Secondary static      | 1.3 | Generalised                               | Fixed  | Inherited – Acquired                   | Bilateral nigrostriatal necrosis, Aicardi Goutieres type 6<br>ADAR1 positive | Bilateral nigrostriatal necrosis                                            | Diazepam<br>Baclofen<br>Trihexiphenidyl                                | 2    | 0.61 | 102.5 | 74     | 27.8  |
| 32 | 6.7  | M | Secondary static      | 1.7 | Generalised                               | Fixed  | Inherited - Acquired                   | Bilateral nigro-striatal necrosis, Aicardi Goutieres type 6. ADAR1 positive  | Bilateral nigrostriatal necrosis                                            | Baclofen<br>Carbamazepine                                              | 5    | 0.75 | 83    | 62     | 25.3  |
| 33 | 13.1 | F | Secondary static      | 0.1 | Generalised                               | Phasic | Uncertain                              | Unknown. Bilateral perisylvian polymicrogyria with epilepsy and dystonia     | Malformation: Perisylvian polymicrogyria and cerebellar atrophy             | Tetrabenazine<br>Trihexiphenidyl                                       | 13   | 0.99 | 104   | 97     | 6.7   |
| 34 | 15.7 | M | Secondary static      | 3.7 | Generalised but predominantly right sided | Fixed  | Probably Acquired                      | Unknown                                                                      | Left putaminal reduced volume                                               |                                                                        | 12   | 0.76 | 80    | 65.5   | 18.1  |
| 35 | 7.1  | M | Secondary static      | 0.1 | Generalised                               | Fixed  | Probably inherited: affected sister    | Unknown                                                                      | PVWM                                                                        | Tetrabenazine<br>Co-careldopa                                          | 7    | 0.99 | 97    | 101    | -4.1  |
| 36 | 8.9  | F | Secondary static      | 6   | Generalised                               | Phasic | Probably inherited                     | Unknown. Congenital neuromuscular disorder: LMNA mutation                    | Normal                                                                      | Trihexiphenidyl                                                        | 2.9  | 0.33 | 52.5  | 64     | -21.9 |
| 37 | 17.2 | F | Secondary progressive | 8.2 | Generalised                               | Fixed  | Inherited – inborn error of metabolism | NBIA- PANK2 deficiency                                                       | Iron deposition in GP and nigro-striatal tract.                             | None                                                                   | 9    | 0.52 | 59.5  | 78     | -31.1 |
| 38 | 7.9  | F | Secondary progressive | 5.9 | Generalised                               | Fixed  | Inherited – inborn error of metabolism | NBIA- PANK2 deficiency                                                       | Iron deposition in GP and nigro-striatal tract.                             | Baclofen<br>Diazepam<br>Trihexiphenidyl                                | 2    | 0.25 | 64    | 102    | -59.4 |
| 39 | 10.5 | M | Secondary progressive | 5.5 | Generalised                               | Fixed  | Inherited – inborn error of metabolism | NBIA- PANK2 deficiency                                                       | Iron deposition in GP and nigro-striatal tract.                             | Baclofen<br>Diazepam                                                   | 5    | 0.48 | 98    | 95.5   | 2.6   |
| 40 | 4.3  | M | Secondary Progressive | 1.5 | Generalised                               | Fixed  | Inherited – inborn error of metabolism | NBIA- PANK2 deficiency                                                       | Iron deposition in GP and nigro-striatal tract.                             | Trihexiphenidyl<br>Haloperidol<br>Clonidine                            | 2.8  | 0.65 | 97.5  | N/A ** | N/A** |
| 41 | 13.6 | F | Secondary progressive | 3.6 | Generalised                               | Fixed  | Inherited – inborn error of metabolism | NBIA- PANK2 deficiency                                                       | Iron deposition in GP and nigro-striatal tract.                             | Intrathecal baclofen                                                   | 10   | 0.74 | 120   | 18     | 85.0  |
| 42 | 9.6  | F | Secondary progressive | 3.1 | Generalised                               | Fixed  | Inherited – inborn error of metabolism | NBIA- PANK2 deficiency                                                       | Iron deposition in GP and nigro-striatal tract.                             | Baclofen<br>Trihexiphenidyl<br>Gabapentin                              | 6.5  | 0.68 | 82.5  | 85     | -3.0  |
| 43 | 16.4 | M | Secondary             | 4.4 | Generalised                               | Fixed  | Inherited – inborn                     | NBIA- PANK2 deficiency                                                       | Iron deposition in GP and nigro-                                            | Diazepam                                                               | 12   | 0.73 | 114   | 98.5   | 13.6  |

|    |   |   |                          |   |             |       |                                           |                        |                                                     |                                                      |   |      |      |     |       |
|----|---|---|--------------------------|---|-------------|-------|-------------------------------------------|------------------------|-----------------------------------------------------|------------------------------------------------------|---|------|------|-----|-------|
|    |   |   | progressive              |   |             |       | error of metabolism                       |                        | striatal tract.                                     | Baclofen<br>Tetrabenazine<br>Clonazepam              |   |      |      |     |       |
| 44 | 6 | M | Secondary<br>progressive | 2 | Generalised | Fixed | Inherited – inborn<br>error of metabolism | NBIA- PANK2 deficiency | Iron deposition in GP and nigro-<br>striatal tract. | Co-Careldopa,<br>Trihexiphenidyl<br>Sodium valproate | 4 | 0.67 | 86.5 | 107 | -23.7 |

**Table S1 – Clinical Data for individual patients**

PVWM = Periventricular White Matter signal change, GP = Globi pallidi

\* patient had DBS electrodes removed 3 months post procedure due to infection

\*\* patient had DBS electrodes removed 1 month post procedure to due brain abscess associated with coincident acute hepatitis A infection which had provoked status dystonicus prior to DBS surgery and followed by nephrotic syndrome after DBS surgery.
